# Supplementary material for: Lower limb MSK injuries among school-aged rugby and football players: a systematic review
Source: PubMed Central journal article supplement (PMC7642221; doi:10.1136/bmjsem-2020-000806), 2020-10-28
Supplement: bmjsem-2020-000806s001.pdf [file bmjsem-2020-000806s001.pdf]

Table 3. Injury Incidence and most common lower limb injury and injury type

| Study            | Incidence                    | Injury site                     | Type of injury                          |
|------------------|------------------------------|---------------------------------|-----------------------------------------|
| Archbold (R)     | 29.06                        | knee/ankle/hamstring            | sprain/strain                           |
| Barden (R)       | 77 (AASE) 34 (non-ASSE)      | ankle/knee/thigh                | sprain/strain                           |
| Brown (R)        | 47.9 (all) 23.1 (TL)         | not specified                   | sprain/strain                           |
| Haseler (R)      | 24 (all) 49.3 (U17)          | knee/ankle                      | joint/ligament                          |
| Leung (R)        | 31.8                         | knee/ankle and foot             | ligament/joint                          |
| Leung (R)        | 23.7 (all) 49.2 (14yo)       | knee/ankle                      | ligament/joint                          |
| Nicol (R)        | 10.8                         | knee/calf muscle                | sprain/strain                           |
| Orr (R)          | 37.1                         | ankle/knee                      | bruises/contusions<br>hematoma/sprain   |
| Palmer-Green (R) | 47 (academy)<br>35 (schools) | knee/ankle/heel                 | sprain/contusion<br>lacerations/lesions |
| Sewry (R)        | 28.8 (all) 18.9-38.6         | not specified                   | joint/ligament                          |
| Ergun(F)         | 18.4 (MAI) 12.1 (TLI)        | thigh/hip & groin               | strains/contusions                      |
| Kolstrup (F)     | 13.1 (boys) 20.3 (girls)     | ankle/foot/knee/leg             | contusion/dislocation<br>sprain/strain  |
| Read (F)         | 1.32 (p/player) 2.14 (U18)   | knee/ankle/quads                | strain/sprain                           |
| Lathlean (AF)    | 37.2                         | thigh/ankle/knee<br>hip & groin | muscle/inflammation<br>and swelling     |
| Scase (AF)       | 19.3 (p/club)                | ankle/hamstring                 | joint/muscle strains                    |
| O'Connor (GF)    | 9.26                         | knee/hamstring/ankle            | strain/sprain                           |

Injury incidence per 1000 hours. Mean is specified, unless otherwise stated. TLI – time loss injury.

MAI – medical attention injury. R – rugby, F – football, AF – Australian rules football, GF – Gaelic Football.
