# Supplementary material for: Lower limb MSK injuries among school-aged rugby and football players: a systematic review
Source: PubMed Central journal article supplement (PMC7642221; doi:10.1136/bmjsem-2020-000806), 2020-10-28
Supplement: bmjsem-2020-000806s002.pdf [file bmjsem-2020-000806s002.pdf]

**Standard Quality Assessment Criteria - Checklist for assessing the quality of quantitative studies**

**Key: Yes (2), Partial (1), No (0), N/A (not applicable)**

| Criteria / study                                                                                                                                | Archbold | Barden  | Brown   | Ergun   | Haseler | Kolstrup | Lathlean | Leung (JSS) | Leung (JSAMS) | Nicol   | O'Connor | Orr     | Palmer-Green | Read    | Scase   | Sewry   |
|-------------------------------------------------------------------------------------------------------------------------------------------------|----------|---------|---------|---------|---------|----------|----------|-------------|---------------|---------|----------|---------|--------------|---------|---------|---------|
| 1. Question / objective sufficiently described?                                                                                                 | 2        | 2       | 2       | 2       | 2       | 2        | 2        | 2           | 2             | 2       | 2        | 2       | 2            | 2       | 2       | 2       |
| 2. Study design evident and appropriate?                                                                                                        | 2        | 2       | 2       | 2       | 2       | 2        | 2        | 2           | 2             | 2       | 2        | 2       | 2            | 2       | 2       | 2       |
| 3. Method of subject / comparison group (if applicable) characteristics sufficiently described?                                                 | 2        | 2       | 2       | 2       | 1       | 1        | 1        | 1           | 2             | 2       | 2        | 2       | 1            | 1       | 2       | 1       |
| 4. Subject (and comparison group, if applicable) characteristics sufficiently described?                                                        | 2        | 1       | 1       | 2       | 1       | 1        | 1        | 1           | 1             | 1       | 2        | 1       | 1            | 2       | 0       | 0       |
| 5. If interventional and random allocation was possible, was it described?                                                                      | N/A      | N/A     | N/A     | N/A     | N/A     | N/A      | N/A      | N/A         | N/A           | N/A     | N/A      | N/A     | N/A          | N/A     | N/A     | N/A     |
| 6. If interventional and blinding of investigators was possible, was it reported?                                                               | N/A      | N/A     | N/A     | N/A     | N/A     | N/A      | N/A      | N/A         | N/A           | N/A     | N/A      | N/A     | N/A          | N/A     | N/A     | N/A     |
| 7. If interventional and blinding of subjects was possible, was it reported?                                                                    | N/A      | N/A     | N/A     | N/A     | N/A     | N/A      | N/A      | N/A         | N/A           | N/A     | N/A      | N/A     | N/A          | N/A     | N/A     | N/A     |
| 8. Outcome and (if applicable) exposure measures well defined and robust to measurement / misclassification bias? Means of assessment reported? | 2        | 2       | 2       | 2       | 1       | 1        | 2        | 2           | 2             | 2       | 2        | 2       | 2            | 2       | 2       | 2       |
| 9. Sample size appropriate?                                                                                                                     | 2        | 2       | 2       | 2       | 2       | 2        | 2        | 2           | 2             | 2       | 2        | 1       | 2            | 1       | 2       | 2       |
| 10. Analytical methods described / justified and appropriate?                                                                                   | 2        | 2       | 2       | 2       | 2       | 2        | 2        | 2           | 1             | 1       | 2        | 2       | 2            | 1       | 2       | 2       |
| 11. Some estimate of variance is reported for main results?                                                                                     | 2        | 2       | 2       | 2       | 2       | 2        | 1        | 2           | 2             | 0       | 2        | 1       | 2            | 1       | 1       | 1       |
| 12. Controlled for confounding?                                                                                                                 | 1        | 0       | 0       | 0       | 0       | 1        | 0        | 0           | 1             | 0       | 0        | 0       | 0            | 0       | 0       | 0       |
| 13. Results reported in sufficient detail?                                                                                                      | 2        | 2       | 2       | 2       | 2       | 2        | 2        | 2           | 2             | 2       | 2        | 2       | 2            | 1       | 2       | 1       |
| 14. Conclusions supported by results?                                                                                                           | 2        | 2       | 2       | 2       | 2       | 2        | 2        | 2           | 2             | 1       | 2        | 1       | 1            | 1       | 1       | 2       |
| <b>TOTAL SUM / TOTAL POSSIBLE SUM (28 TPS = 28 - (N/A x2)</b>                                                                                   | 21 / 22  | 19 / 22 | 19 / 22 | 20 / 22 | 17 / 20 | 18 / 22  | 17 / 22  | 18 / 22     | 19 / 22       | 15 / 22 | 20 / 22  | 16 / 22 | 17 / 22      | 14 / 22 | 16 / 22 | 15 / 22 |
