# Supplementary material for: Lower limb MSK injuries among school-aged rugby and football players: a systematic review
Source: PubMed Central journal article supplement (PMC7642221; doi:10.1136/bmjsem-2020-000806), 2020-10-28
Supplement: bmjsem-2020-000806s003.pdf [file bmjsem-2020-000806s003.pdf]

| Author and title of paper                                                                                                                                                                                                               | Study design                           | Methods                                                                       | Data Collection                                                                         | Timeframe                                         | Number of participants | Age Range | Total number of injuries | Number of participants who received an injury | Total number of lower limb injuries | Participants who received more than one injury | Defined as a time loss injury  | Defined as medical attention injury only | Soft tissue (strain or tear)                             | Bone (fracture)                                   | Joint (capsule, meniscus and ligament injury) | Hip / Groin                                       | Knee                                              | Ankle / Foot       | Thigh         | Calf / Lower leg | History of at least one previous sports injury | Most common injury MOI / region                               | Recurrent injury / re-injury       |  |
|-----------------------------------------------------------------------------------------------------------------------------------------------------------------------------------------------------------------------------------------|----------------------------------------|-------------------------------------------------------------------------------|-----------------------------------------------------------------------------------------|---------------------------------------------------|------------------------|-----------|--------------------------|-----------------------------------------------|-------------------------------------|------------------------------------------------|--------------------------------|------------------------------------------|----------------------------------------------------------|---------------------------------------------------|-----------------------------------------------|---------------------------------------------------|---------------------------------------------------|--------------------|---------------|------------------|------------------------------------------------|---------------------------------------------------------------|------------------------------------|--|
| Archbold et al. (2017) RISUS study: rugby injury surveillance in Ulster schools. <i>BJSM</i> , 51, 600 - 606. Doi 10.1136/bjsports-2015-095491                                                                                          | Prospective Injury Surveillance Study  | Online reporting system for recording injury data                             | Data imputed weekly by data champion                                                    | One playing season (2014/15)                      | 825                    | 16 - 17   | 426                      |                                               | 171                                 |                                                | n=208 (28+ days) 90% (7+ days) |                                          | 65                                                       | 38                                                | 146                                           | 16                                                | 56                                                | 47                 | 37            | 14               | 552                                            | Tackle / Collision lower limb                                 |                                    |  |
| Barden et al. (2018) Epidemiology of injury in elite English schoolboy rugby union: A 3-year study comparing different competitions. <i>Journal of Athletic Training</i> , 53(5), 514 - 520. Doi 10.4085/1062-6050-311-16               | Retrospective Cohort Study             | Injury surveillance study using Orchard's Sports Injury Classification System | Medical team recorded all injuries pitchside or in clinic                               | Three seasons (Aug 12 - May 2015)                 | 132                    | 16 - 19   | 103                      | 64                                            |                                     |                                                | 103                            |                                          | 26                                                       | 2                                                 | 33                                            |                                                   |                                                   |                    |               |                  |                                                | Tackle / Collision lower limb (by a small margin)             |                                    |  |
| Brown et al. (2012) The incidence and severity of injuries at the 2011 South African Rugby Union (SARU) youth week tournaments. <i>SAJSM</i> , 24(2), 49 - 54. Doi                                                                      | Prospective Cohort Study               | Injury surveillance using paper-based questionnaire                           | Data collected by data champion at each event, submitted to tournament doctor           | Four 1-week events during June and July 2011      | 1804                   | 12 - 18   | 189                      | 185                                           |                                     | 4                                              | 91                             | 87 (11 not diagnosed)                    | U16 - 14% U18 - 16% U18 - 0%                             | U16 - 3% U18 - 2%                                 | U16 - 31% U18 - 32% U18 - 37%                 |                                                   |                                                   |                    |               |                  |                                                |                                                               | Muscle / tendon & joint / ligament |  |
| Ergun et al. (2013) Injuries in elite youth football players: a prospective three year study. <i>AOTT</i> , 47(5), 339 - 346. Doi 10.3944/AOTT.2013.3177                                                                                | Prospective longitudinal 3 year study  | Injury surveillance over 3 years with one group of players                    | Data imputed post match by designated data champion                                     | Three seasons (05/06, 06/07, 07/08)               | 52                     | 16 - 17   | 44                       | 24                                            | 79.50%                              |                                                | 29                             | 15                                       | 17                                                       | 0                                                 | 4                                             | 8                                                 | 2                                                 | 2                  | 8             | 0                |                                                | Non-contact / lower limb                                      | 11                                 |  |
| Haseler et al. (2010) The epidemiology of injuries in youth community rugby union. <i>BJSM</i> , 44, 1093 - 1099. Doi 10.1136/bjism.2010.074021                                                                                         | Prospective Cohort Study               | Injury surveillance using paper-based questionnaire                           | Data imputed weekly by designated first aider / coach                                   | One season (9 months)                             | 210                    | 7 - 17    | 39                       | 33                                            |                                     | 4                                              |                                |                                          |                                                          |                                                   |                                               |                                                   | 4.9 / 1000ph                                      | 2.4 / 1000ph       |               |                  |                                                | Tackling (tackler and ball carrier) knee                      |                                    |  |
| Kolstrup et al. (2016) Injuries during football tournaments in 45,000 children and adolescents. <i>European Journal of Sports Science</i> , 16(8), pp. 1167 - 1175                                                                      | Cohort Study                           | Football related medical attention injury data recorded each day of event     | Data collected by data champions at each event                                          | Three Dana Cup (four day) tournaments (2012-2014) | 45606                  | 11 - 19   | 2518                     | 1831 boys (1091 girls)                        |                                     |                                                | 1831                           |                                          | Spr / Str 11-15yo 2.74 (1000 ph) 16 - 19yo 3.53 (1000ph) | 11 - 15yo 1.14 (1000 ph) 16 - 19yo 0.53 (1000 ph) | 11 - 15yo 1.62 (1000 ph) 19yo 1.95 (1000ph)   | 11 - 15yo 1.97 (1000 ph) 16 - 19yo 2.77 (1000 ph) | 11 - 15yo 3.29 (1000 ph) 16 - 19yo 4.40 (1000 ph) |                    |               |                  | 20 (excluded from study)                       | Lower limb (older boys), shoulder & upper limb, younger boys) | 563 (excluded from study)          |  |
| Lathlean et al. (2018) The incidence, prevalence, severity, mechanism and body region of injury in elite junior Australian football players: A prospective cohort study over one season. <i>JSAMS</i> . Doi 10.1016/j.jsams.2018.03.002 | Prospective Cohort Study               | Online reporting system for recording injury data                             | Injuries reported by players and medics, recorded by physiotherapists                   | Six months (2014 playing season)                  | 562                    | 16 - 18   | 1192                     | 449                                           | 720                                 | 28                                             |                                |                                          | 52                                                       | 0                                                 | 91                                            | 109                                               | 140                                               | 112                | 193           | 116              |                                                | Contact (player / collision) / lower limb                     | 36                                 |  |
| Leung et al. (2017) Injuries in Australian school level rugby union. <i>JoSpSc</i> , 35(21), 2088-2092. Doi 10.1080/02640414.2016.1255771                                                                                               | Prospective Observational Study        | Injury surveillance using paper-based questionnaire                           | Data imputed weekly by physiotherapist / sport trainers                                 | One eight week playing season                     | 480                    | 17 - 18   | 80                       | 76                                            |                                     | 2                                              |                                |                                          | 8                                                        | 8                                                 | 27                                            | 2                                                 | 7                                                 | 7                  | 2             |                  |                                                | Tackling (tackler and ball carrier) lower limb                | 2                                  |  |
| Leung et al. (2017) Epidemiology of injuries in Australian school level rugby union. <i>JSAMS</i> , 20(2017), 740 - 744. Doi 10.1016/j.jsams.2017.03.006                                                                                | Prospective Observational Study        | Injury surveillance using paper-based questionnaire                           | Data imputed weekly by designated first aiders                                          | One playing season (2016)                         | 3585                   | 9 - 18    | 332                      | 310                                           | 79                                  | 22                                             |                                |                                          | 13                                                       | 0                                                 | 36                                            | 9                                                 | 27                                                | 27                 | 8             | 7                |                                                | Tackling (tackler and ball carrier) lower limb                |                                    |  |
| Nicol et al. (2010) Rugby union injuries in Scottish schools. <i>JPH</i> , 33(2), 256 - 261. Doi 10.1093/pubmed/fdq047                                                                                                                  | Prospective Cohort Study               | Injury surveillance using paper-based questionnaire                           | Data collected by designated member of staff                                            | Four months (2009)                                | 470                    | 11 - 16   | 37                       | 8                                             |                                     |                                                | 8                              | 29                                       | 6                                                        | 5                                                 | 11                                            | 0                                                 | 5                                                 | 0                  | 0             | 3                |                                                | (tackler and ball carrier) inner limb                         |                                    |  |
| O'Connor et al. (2015) Epidemiology of injury in male adolescent games. <i>JSAMS</i> , 19(2016), 384 - 388. Doi 10.1016/j.jsams.2015.06.002                                                                                             | Prospective Cohort Study               | Injury surveillance based on NCAAISS                                          | Data collected by designated data champion                                              | One year                                          | 292                    | 14 - 17   | 125                      | 95                                            |                                     | 25                                             |                                |                                          | GF - 28% H 14%                                           | GF - 4% H 6.1%                                    | GF - 28% H 16.3%                              | GF - 13.3% H - 10%                                | GF - 18.7% H - 20%                                | GF - 12.7% H - 12% | GF - 28% H 8% | GF - 6.7 H - 6%  |                                                | Non contact / lower limb (though)                             | GF - 47.3% H 33.3%                 |  |
| Orr et al. (2016) Incidence and characteristics of injuries in elite Australian junior rugby league players. <i>JSAMS</i> 19, 212 - 217. Doi 10.1016/j.jsams.2015.03.007                                                                | Prospective cohort Study               | Injury surveillance using paper-based questionnaire                           | Data collected by designated person, follow-up completed by physio, rehab pro or doctor | One Season (2012)                                 | 122                    | 14 - 17   | 109                      | 63                                            | 48                                  | 15                                             |                                |                                          | 8                                                        | 4                                                 | 29                                            |                                                   | 10                                                | 14                 | 12            | 12               | 69% (51% from Rugby)                           | Tackling (tackler and ball carrier) lower limb                |                                    |  |
| Palmer-Green et al. (2013) Match injuries in English youth academy and schools rugby union. An epidemiological study. <i>JSJM</i> , 41(4), 749 - 755. Doi 10.1177/0963946512473818                                                      | Prospective Observational Cohort Study | Injury Surveillance based on Orchard's coding system                          | Data imputed weekly by first team coach, nurse or physician                             | Two seasons (2006/07 and 07/08)                   | 472                    | 16 - 18   | 243                      |                                               |                                     |                                                |                                |                                          | 17                                                       | 6                                                 | 38                                            |                                                   | 21                                                |                    |               |                  |                                                | Tackling (tackler and ball carrier) lower limb                | 28                                 |  |
| Read et al. (2017) An Audit of injuries in six english professional soccer academies. <i>J Sp Sci</i> , 36(13), 1542 - 1548. Doi 10.1080/02640414.2017.1402535                                                                          | Prospective Cohort Study               | Injury surveillance using questionnaire based injury form                     | Data recorded by club doctor                                                            | one season (2014/15)                              | 608                    | 11 - 18   | 804                      |                                               |                                     |                                                |                                |                                          | 162                                                      | 23                                                | 131                                           | 102                                               | 161                                               | 147                | 125           | 34               |                                                | Non-contact / lower limb                                      |                                    |  |
| Scase et al. (2012) The epidemiology of injury for an elite junior Australian football cohort. <i>JSAMS</i> 15, 207 - 212. Doi 10.1016/j.jsams.2011.12.002                                                                              | longitudinal Cohort Study              | Injury surveillance questionnaire, using Orchard classification system        | Data imputed post match by designated data champion                                     | One season                                        | 532                    | 15 - 18   | 256                      |                                               | 164                                 |                                                |                                |                                          |                                                          |                                                   |                                               | 80                                                | 30                                                | 54                 |               |                  |                                                | Non-contact / lower limb                                      | 12.8% (2.2 per club)               |  |
| Sewry et al. (2019) Seasonal time-loss match injury rates and burden in South African under-16 rugby teams. <i>JSAMS</i> , 22, 54-58. Doi 10.1016/j.jsams.2018.06.007                                                                   | Prospective Cohort Study               | Time loss injuries recorded using questionnaire based data collection form    | Data collected by designated medical person, minimum 24 hrs time loss outcome           | One playing season (2017)                         | 130                    | 15 - 16   |                          |                                               |                                     |                                                | 33                             |                                          |                                                          |                                                   | 12.2 / 1000 ph                                |                                                   |                                                   |                    |               |                  |                                                | Tackling (tackler and ball carrier) lower limb                |                                    |  |
